# Supplementary material
Source: PubMed Central journal article supplement (PMC4372002)
Supplement: pnas.201500076SI.pdf [file pnas.201500076SI.pdf]

# Supporting Information

Jiang et al. 10.1073/pnas.1500076112

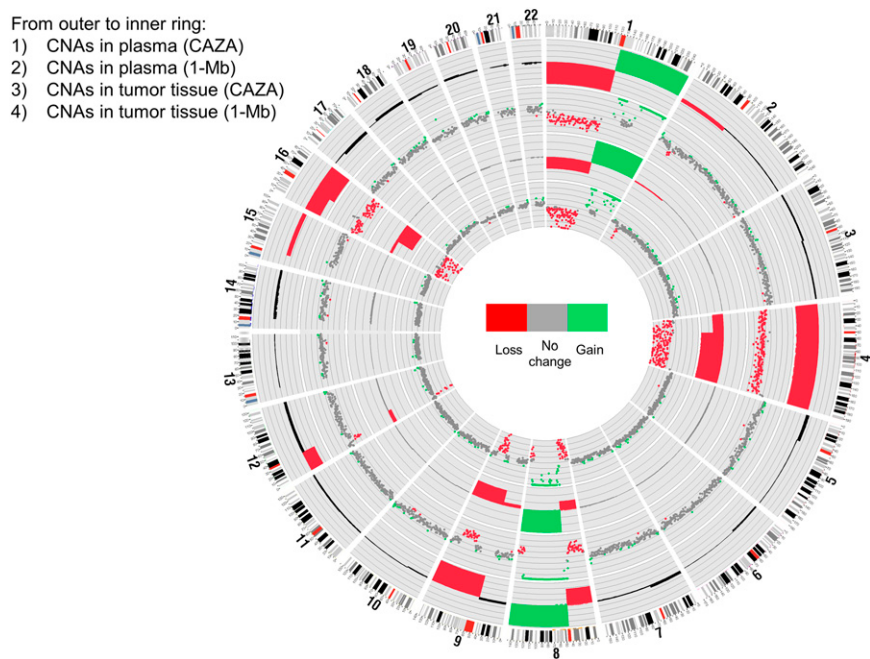

**Fig. S1.** Circos plots showing the CNAs detected in the plasma sample and the corresponding tumor tissue of a representative HCC patient. From outside to inside: arm-level plasma CNAs; plasma CNAs (in 1-Mb resolution); arm-level CNAs in the tumor tissue; CNAs in the tumor tissue (in 1-Mb resolution). Regions with gains and losses are shown in green and red, respectively. The distance between two consecutive horizontal lines represents a z score of 5. Chromosome ideograms (outside the plots) are oriented from pter to qter in a clockwise direction.

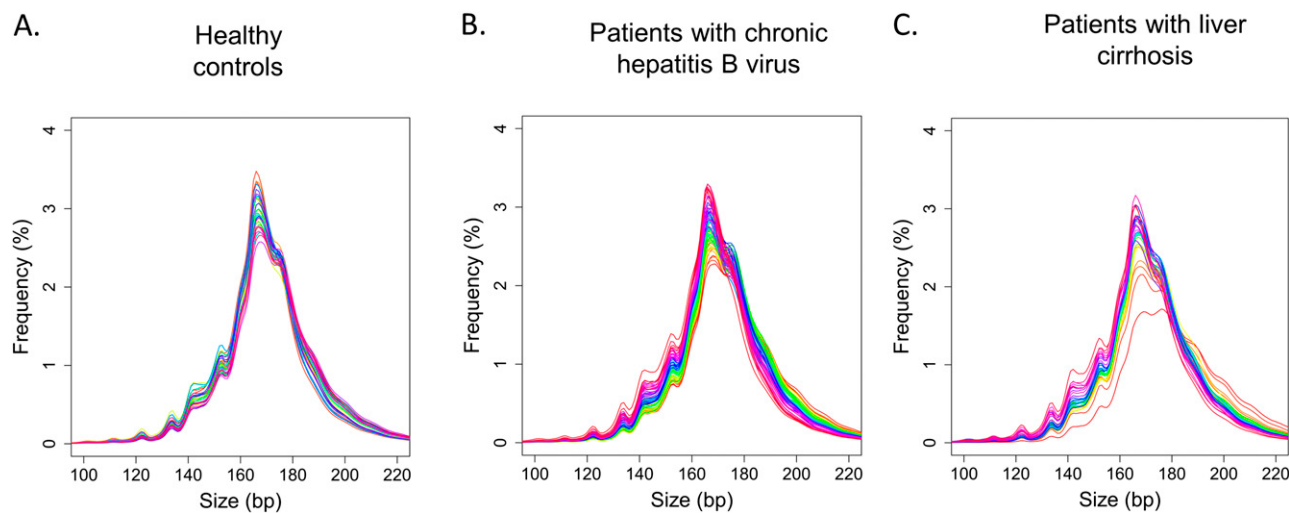

**Fig. S2.** Size profiles of plasma DNA for (A) healthy controls, (B) chronic HBV carriers, and (C) cirrhotic patients. Each individual is represented by a different color.

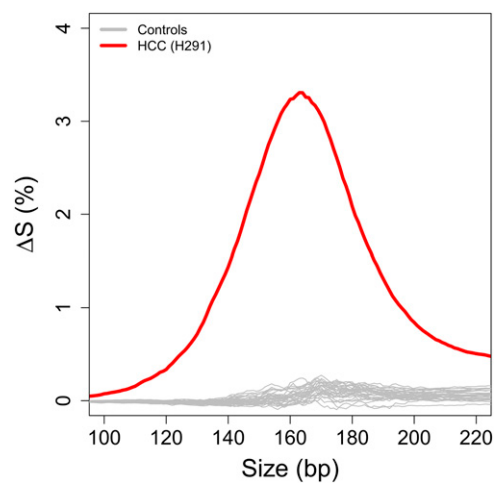

**Fig. S3.** Plot of the values of  $\Delta S$  between 1q and 1p against size for a representative HCC patient.

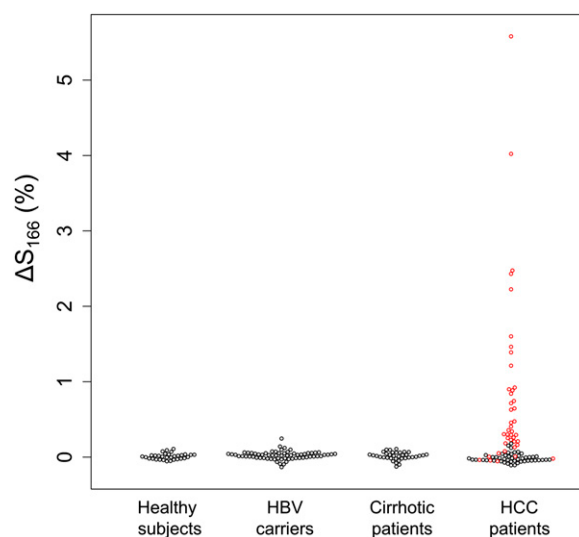

**Fig. S4.** Plot of the values of  $\Delta S_{166}$  between 1q and 1p for healthy control subjects, HBV carriers, cirrhotic patients, and HCC patients. For the HCC group, patients with and without different CNAs on 1p and 1q as determined by plasma CAZA analysis are represented by red and black dots, respectively.
